# Supplementary material for: Between Consultation and Collaboration: Self-Reported Objectives for 25 Web-Based Geoparticipation Projects in Urban Planning
Source: MDPI journal article supplement (doi:10.3390/ijgi10110783), 2021-11-17
Supplement: s1 [file s1]

## Supplementary S1- List of sampled web-based geoparticipation platforms

| Platform name                            | Platform type                               | Geoparticipation level | Investigated | Platform URL                                                                                            |
|------------------------------------------|---------------------------------------------|------------------------|--------------|---------------------------------------------------------------------------------------------------------|
| Bästa Platsen                            | 2D geoparticipation                         | Intermediate           | Yes          | <a href="http://www.spacescape.se/dialo ger/">http://www.spacescape.se/dialo ger/</a>                   |
| Carticipe-Debatomap                      | 2D geoparticipation                         | Advanced               | Yes          | <a href="https://carticipe.net/">https://carticipe.net/</a>                                             |
| CitizenLab                               | Multifunctional, incl. 2D geoparticipation  | Intermediate           | No           | <a href="https://www.citizenlab.co/">https://www.citizenlab.co/</a>                                     |
| CityPlanner & MinStad                    | 3D geoparticipation                         | Advanced               | Yes          | <a href="https://minstad.goteborg.se/minstad/index.do">https://minstad.goteborg.se/minstad/index.do</a> |
| Commonplace                              | Multifunctional, incl. 2D geoparticipation  | Intermediate-advanced  | Yes          | <a href="https://www.commonplace.is/">https://www.commonplace.is/</a>                                   |
| coUrbanize                               | Multifunctional, incl. 2D geoparticipation  | Intermediate           | Yes          | <a href="https://www.courbanize.com/">https://www.courbanize.com/</a>                                   |
| Decidim                                  | Multifunctional, incl. 2D geoparticipation  | Intermediate           | No           | <a href="https://decidim.org/">https://decidim.org/</a>                                                 |
| Emotional Maps                           | 2D geoparticipation                         | Advanced               | Yes          | <a href="https://www.pocitovemapy.cz/index-en.html">https://www.pocitovemapy.cz/index-en.html</a>       |
| Engagement HQ                            | Multifunctional, incl 2D geoparticipation   | Basic                  | No           | <a href="https://www.bangthetable.com/">https://www.bangthetable.com/</a>                               |
| Mapping for Change                       | 2D geoparticipation                         | Advanced               | Yes          | <a href="http://mappingforchange.org.uk/">http://mappingforchange.org.uk /</a>                          |
| Maptionnaire                             | 2D geoparticipation                         | Advanced               | No           | <a href="https://maptionnaire.com/">https://maptionnaire.com/</a>                                       |
| MetroQuest                               | Multifunctional, incl. 2D geoparticipation  | Very basic             | No           | <a href="https://metroquest.com/">https://metroquest.com/</a>                                           |
| Social Pinpoint                          | Multifunctional, mostly 2D geoparticipation | Intermediate-advanced  | Yes          | <a href="https://www.socialpinpoint.com/">https://www.socialpinpoint.com /</a>                          |
| Stickyworld (Confers since January 2019) | Multifunctional, incl. 2D geoparticipation  | Intermediate           | No           | <a href="https://info.confers.com/old-home">https://info.confers.com/old-home</a>                       |
| TransformCity                            | Multifunctional, incl. 2D geoparticipation  | Intermediate           | Yes          | <a href="https://www.transformcity.com/">https://www.transformcity.com/</a>                             |
| Urban Interactive Studio (now Konveio)   | Multifunctional, incl. 2D geoparticipation  | Basic                  | No           | <a href="https://konve.io/about-us">https://konve.io/about-us</a>                                       |

## Supplementary S2

### Survey about digital participatory platforms and public participation

---

#### Part 1: Survey Description and Consent Statement

**Thank you for considering this survey. Your feedback can support best practice in public engagement.**

##### **About the survey**

You are invited to answer questions about your experience of using digital participatory platforms for engaging residents in urban planning.

The survey should take approximately 10 minutes to complete. You can also save your responses and finish later.

The survey aims to collect information about the value of digital participatory platforms (e.g. CitizenLab, Transform City, Commonplace, Carticipe, among others) to engage residents in urban planning. This survey is part of an independent academic research project (see information below), and will feature journal publications in collaboration with other researchers.

The questions are divided into two main themes:

1. the choice and range of functionalities of the digital participatory platform
2. The digital participatory platform and public participation

The survey will also be sent to local planners in France, the UK, the USA, Czech Republic and Sweden who have procured similar digital engagement services.

##### **Your Participation**

Your participation rights are legislated by the General Data Protection Regulation (GDPR) and UK Data Protection Act 2018, which states that personal information must be managed in a responsible, secure, and transparent way. You can view a summary of the GDPR Principles [here](#).

In sum:

You are free to withdraw your permission at any time.

You can ask to access the collected information at any time.

Your input will be kept anonymous and confidential. The name of your organisation will be kept confidential and anonymised, and you can suggest a name by which you or your organisation can be referred to in the research outputs.

You are free to answer the survey as you see fit. The questions do not incur any known risk for yourself or your organisation.

##### **Data management**

This questionnaire is distributed by Online surveys. You can find details of their data security policy [here](#). Online Surveys is fully compliant with UK data protection laws. It is the favoured choice of Northumbria University. The data will be downloaded by the researcher and processed in data analysis software.

The data files will be password-protected during and after the research project. Data will be stored securely for the duration and beyond completion of the research project, for a maximum of five years. The data collected in the questionnaire may be used for comparative studies by the researcher in the future.

Your personal details, if known by the researcher, will be kept confidential at all times of the research process, including after the end of the research project.

#### **Sharing/publication of the research output**

Research output, including the analysis of the questionnaire, will be disseminated through conference papers and likely also a publication in an academic journal. The research output may also be disseminated through blog posts that could be read by other practitioners and researchers.

The data will not be used for marketing purposes.

#### **About the research and the researcher**

The survey is part of research that investigates

The research is conducted by

If you have any queries about the survey or the research, or would like to withdraw your participation/permission at any time, please get in touch:

#### **In order to participate in the survey, please consider the following statements:**

- I consent to take part in this survey
- I have been given information about the survey and the research. I have read and understand the purpose of the study.
- I understand I can withdraw my consent at any time, without giving a reason and without prejudice.
- I know that my name and details will be kept confidential and will not appear in any printed documents.
- None of the participants will be identified in the project report or in other publications
- based on this project. Copies of any reports or publications will be available on request to participants.

1. Do you agree to the above terms? By clicking "Yes", you will participate in the survey.

*\* Required*

- ☐ YES, I want to participate in the survey
- ☐ NO, I do not want to participate in the survey

## **Part 2: Basic Respondent Information**

You are invited to provide some basic information about yourself and your organisation.

All information and contact details you provide will be kept anonymous and confidential. Your personal details will not appear in any printed document.

2. What is the name of your organisation?

3. What is the name or location of the planning project for which the platform was used?

4. What is your role/position within your organisation?

5. What is your age?

- ☐ 20-29
- ☐ 30-39
- ☐ 40-49
- ☐ 50-59
- ☐ 60-69
- ☐ 70-79
- ☐ I prefer not to answer

6. How would you rate your proficiency with GIS software (e.g. ArcGIS, QuantumGIS, OpenStreetMap, other mapping software)?

- ☐ Expert
- ☐ Advanced
- ☐ Satisfactory professional proficiency
- ☐ Basic proficiency
- ☐ No experience whatsoever
- ☐ Other

6.a. If you selected Other, please specify:

7. Would you agree to some of your responses being quoted anonymously in research output (e.g. journal publications, PhD thesis, research blog post)?

- ☐ Yes, I consent to my responses being quoted anonymously in research output
- ☐ No, I do not consent to my responses being quoted in research output
- ☐ Other

7.a. If you selected Other, please specify:

### Part 3: Choice and design of the digital participatory platform

This part of the survey concerns the choice and design of the platform, especially its range of functionalities.

8. Why did you choose that particular digital participatory platform over other digital engagement tools? You can choose multiple answers.

- ☐ We were unaware of other digital participatory platforms
- ☐ The platform's range of functionalities was the best match for our public engagement needs
- ☐ The platform was recommended by trusted sources (e.g. colleagues in other local councils/organisations)
- ☐ Technical support was based regionally/nationally
- ☐ Other

8.a. If you selected Other, please specify:

9. Which functionalities on the platform were most useful to mediate community engagement?

10. If the platform featured map-based functionalities, how useful were they to mediate community engagement?

11. Which functionalities on the platform were least useful to mediate community engagement?

Below are some examples of functionalities from other tools.

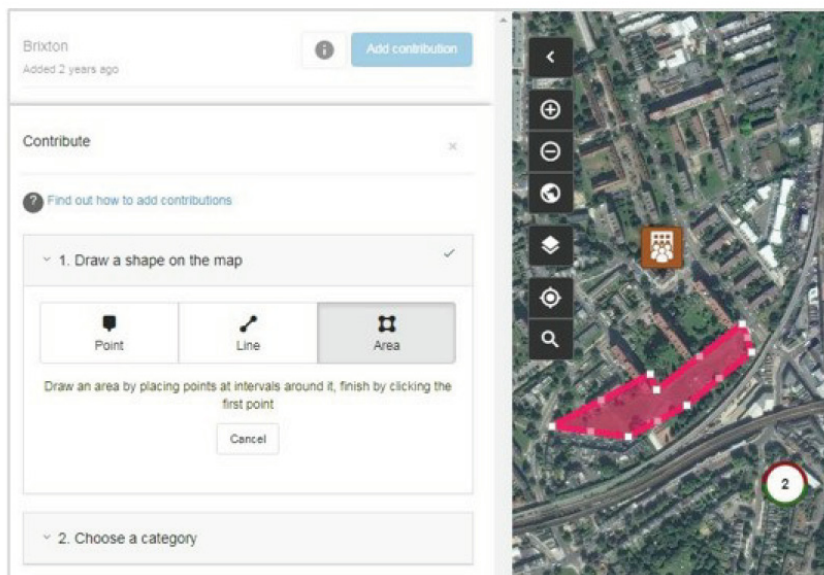

| Statistiques                                                                                                                                                                                                                                                                                                                                                                                                                                                                                                                                                                                                              |                   |                           |                 |                        |                          |                                                                                    |
|---------------------------------------------------------------------------------------------------------------------------------------------------------------------------------------------------------------------------------------------------------------------------------------------------------------------------------------------------------------------------------------------------------------------------------------------------------------------------------------------------------------------------------------------------------------------------------------------------------------------------|-------------------|---------------------------|-----------------|------------------------|--------------------------|------------------------------------------------------------------------------------|
| <p> Pages vues depuis lancement : 108025</p> <p> Participants (visiteurs inscrits) : 2062</p> <p> Idées déposées sur la carte : 2959</p> <p> Commentaires : 1430</p> <p> Total des votes : 20600</p> |                   |                           |                 |                        |                          |                                                                                    |
| Thèmes<br>(Cliquez pour lister)                                                                                                                                                                                                                                                                                                                                                                                                                                                                                                                                                                                           | Nombre<br>d'idées | Nombre de<br>commentaires | Total<br>scores | Total<br>votes<br>pour | Total<br>votes<br>contre | Pictos<br>(Cliquez pour<br>lister)                                                 |
|  Urbanisme, habitat,<br>renouvellement<br>urbain                                                                                                                                                                                                                                                                                                                                                                                                                                                                                         | 201               | 124                       | 757             | 908                    | 151                      |  |
|  Économie et<br>attractivité                                                                                                                                                                                                                                                                                                                                                                                                                                                                                                             | 168               | 128                       | 1322            | 1418                   | 96                       |  |
|  Mobilité et<br>déplacements                                                                                                                                                                                                                                                                                                                                                                                                                                                                                                             | 1578              | 701                       | 9274            | 10084                  | 810                      |  |

12. Which functionalities that were missing on the platform would have been particularly useful to mediate community engagement?

## Part 4: The platform and the planning context

This final part of the survey concerns the use of digital participatory platforms for public participation in urban planning.

13. What was the nature of the project to which the platform was applied? Please select all that apply.

- ☐ Masterplan
- ☐ Local plan
- ☐ Community map
- ☐ Transport / transit
- ☐ Green space / Parks & recreation
- ☐ Active mobility (e.g. cycling, pedestrian)
- ☐ Climate change
- ☐ Energy
- ☐ Public health
- ☐ Housing
- ☐ Commercial property development
- ☐ Regeneration / Revitalisation
- ☐ Tourism
- ☐ Other

13.a. If you selected Other, please specify:

14. What was the general purpose of engaging local residents in the planning process?  
For example, below are categories provided by the International Association for Public Participation (IAP2). Select those which seem most relevant.

- ☐ INFORM: “To provide the public with balanced and objective information to assist them in understanding the problem, alternatives, opportunities and/or solutions”
- ☐ CONSULT: “To obtain public feedback on analysis, alternatives and/or decisions.”
- ☐ INVOLVE: “To work directly with the public throughout the process to ensure that public concerns and aspirations are consistently understood and considered.”
- ☐ COLLABORATE: “To partner with the public in each aspect of the decision including the development of alternatives and the identification of the preferred solution.”
- ☐ EMPOWER: “To place final decision making in the hands of the public.”

Other

14.a. If you selected Other, please specify:

15. How has the use of the platform supported that goal?

16. How has the platform complemented other methods for public participation?

17. To what extent has the engagement output of the platform influenced planning decisions?

- ☐ No influence
- ☐ Minor influence
- ☐ Moderate influence
- ☐ Significant influence
- ☐ It steered planning decisions
- ☐ Other

17.a. Please briefly develop or give your own answer

18. Which main trends affecting your organisation shape opportunities for public participation ?

- ☐ Economic
- ☐ Political / decision-making
- ☐ Austerity /government budget reductions
- ☐ Internal / organisational
- ☐ Statutory consultation / policies on public participation in planning
- ☐ Other

18.a. Please briefly explain how these or other trends shape opportunities for public Participation

19. How could digital participatory platforms further complement other methods for public participation in the future?

20. Do you have any final comments about digital participatory platforms, the planning context or this particular questionnaire survey?

**Your contact details for future contact or information**



21. Would you be happy to be contacted for further information should the research require it?

- ☐ Yes
- ☐ No

22. Would you like to find out about the research output from this survey (e.g. thesis, infographics, research blog posts)?

- ☐ Yes
- ☐ No

23. If you answered "yes" to one of the above, please provide an email address below.

## **Part 5: Conclusion and Thanks**

**Many thanks for having completed this survey.**

Your kind participation will contribute to a better understanding of the use of digital participatory platforms for public participation in urban planning. It will also support best practice in public participation.

Should you have any questions concerning the survey, do get in touch:

**Wishing you all the best with all your project.**
