# Supplementary material for: Between Consultation and Collaboration: Self-Reported Objectives for 25 Web-Based Geoparticipation Projects in Urban Planning
Source: MDPI journal article supplement (doi:10.3390/ijgi10110783), 2021-11-17
Supplement: s1 [file s1]

Archive with 1 entries (1 files):
- ijgi-1375774-SI.pdf
